# Supplementary material for: Adolescent idiopathic scoliosis: interdisciplinary creative art practice and nature connections
Source: HighWire-hosted journal article supplement (doi:10.1136/medhum-2023-012796), 2023-12-21
Supplement: medhum-2023-012796supp001_data_supplement.pdf [file medhum-2023-012796supp001_data_supplement.pdf]

Manuscript ID: medhum-2023-012796

Supplemental Table 1: Mean scores on TAPS before and after the participation in the event

|                    | N | Minimum | Maximum | Mean | Std. Deviation |
|--------------------|---|---------|---------|------|----------------|
| mean_pre           | 9 | 3       | 5       | 4.26 | .572           |
| mean_post          | 9 | 4       | 5       | 4.11 | .408           |
| Valid N (listwise) | 9 |         |         |      |                |
